# Supplementary material
Source: MDPI journal article supplement (https://www.mdpi.com/2073-4360/3/2/674)

*Supplementary Materials*

## Spectroscopic Investigation of Composite Polymeric and Monocrystalline Systems with Ionic Conductivity

Darya V. Radziuk \* and Helmuth Mühwald

Max-Planck Institute of Colloids and Interfaces, Am Mühlenberg 1, D14424 Potsdam, Germany;

E-Mail: helmuth.moehwald@mpikg.mpg.de

\* Author to whom correspondence should be addressed; E-Mail: darya.radziuk@mpikg.mpg.de;  
Tel.: +49-0-331-567-9447; Fax: +49-0-331-567-9202.

**Figure SI.1.** The fragment of the structural formula of polyethylene oxide  $[-CH_2-CH_2-O-]_n$  with  $n = 2$ .

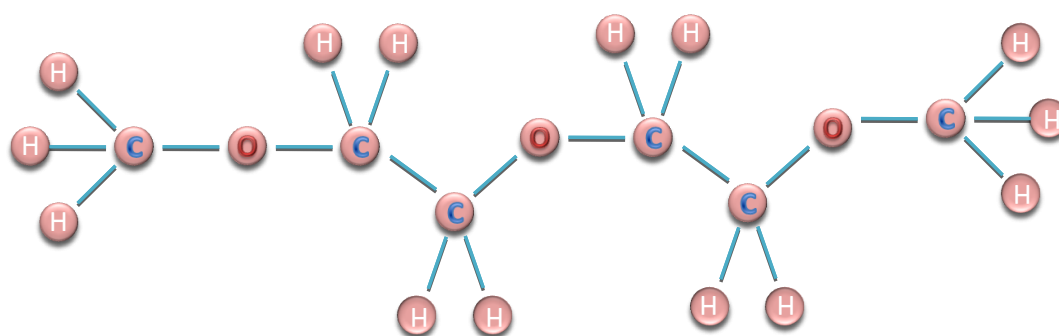

**Table 2.** Raman spectra of (EG)<sub>n</sub>DME (n = 2 and 11) at room temperature.

| (EG) <sub>n</sub> DME |                    | Assignment                                                  |
|-----------------------|--------------------|-------------------------------------------------------------|
| n = 2                 | n = 11             |                                                             |
| 306 <sub>m</sub>      | 271 <sub>m</sub>   | $\delta(\text{COC}), \delta\text{S}, \tau\text{S}$ [16]     |
| 530 <sub>w</sub>      | 536 <sub>w</sub>   | $\delta(\text{COC}), \delta\text{S}$ [16], $r(\text{CH}_2)$ |
| 803 <sub>m</sub>      | 813 <sub>m</sub>   | $r(\text{CH}_2)$                                            |
| 854 <sub>m</sub>      | 844 <sub>m</sub>   | $r(\text{CH}_2)$                                            |
| 925 <sub>w</sub>      | 925 <sub>w</sub>   | $r(\text{CH}_2)_s, \delta(\text{COC})$                      |
| 972 <sub>w</sub>      | 972 <sub>w</sub>   | $r(\text{CH}_2)_s$                                          |
| 994 <sub>w</sub>      | 995 <sub>w</sub>   | $\nu(\text{CO}), \nu\text{S}$ [16]                          |
| 1029 <sub>s</sub>     | 1032 <sub>s</sub>  | $\nu(\text{CO}), \nu\text{S}$ [16]                          |
| 1133 <sub>m</sub>     | 1136 <sub>m</sub>  | $\nu(\text{COC}), \nu\text{S}$ [16], $\nu(\text{CO})$       |
| 1252 <sub>m</sub>     | 1252 <sub>m</sub>  | $t(\text{CH}_2)$                                            |
| 1286 <sub>m</sub>     | 1288 <sub>m</sub>  | $t(\text{CH}_2)_s$                                          |
|                       | 1342 <sub>sh</sub> | $w(\text{CH}_2), \nu\text{S}$ [16]                          |
|                       | 1400 <sub>w</sub>  | $w(\text{CH}_2), \nu$ [16]                                  |
| 1448 <sub>sh</sub>    | 1455 <sub>sh</sub> | $\delta(\text{CH}_2)$                                       |
| 1475 <sub>s</sub>     | 1474 <sub>s</sub>  | $\delta(\text{CH}_2)$                                       |
| -                     | -                  | $\nu(\text{C=O})$                                           |
| -                     | -                  | $\nu(\text{CN})$                                            |
| -                     | -                  | $\nu(\text{CH}_3)$                                          |
| 2948 <sub>vs</sub>    | 2947 <sub>vs</sub> | $\nu(\text{CH}_2)$                                          |

The characteristics of the bands intensity are given in arbitrary units as ‘vw’ (very weak,  $<10^3$ ), ‘w’ (weak,  $1-2 \times 10^3$ ), ‘m’ (medium,  $4-8 \times 10^3$ ), ‘s’ (strong,  $8-10 \times 10^3$ ) and ‘vs’ (very strong,  $>10 \times 10^3$ ).

**Figure SI.2.** The temperature add-on device R495 from Bruker with 1—nipple for tapping; 2—nipple-section for faucet of vacuum device; 3—nipple for tapping supply; 4—thermocouple outlet; 5—contacts of windows electro-heater; 6—measuring thermocouple capping; 7—protective window; 8—cuvette for liquids; 9—tempering jacket; 10—water-proof housing; 11—elastic element; 12—reserve container; 13—contacts of electro-heater.

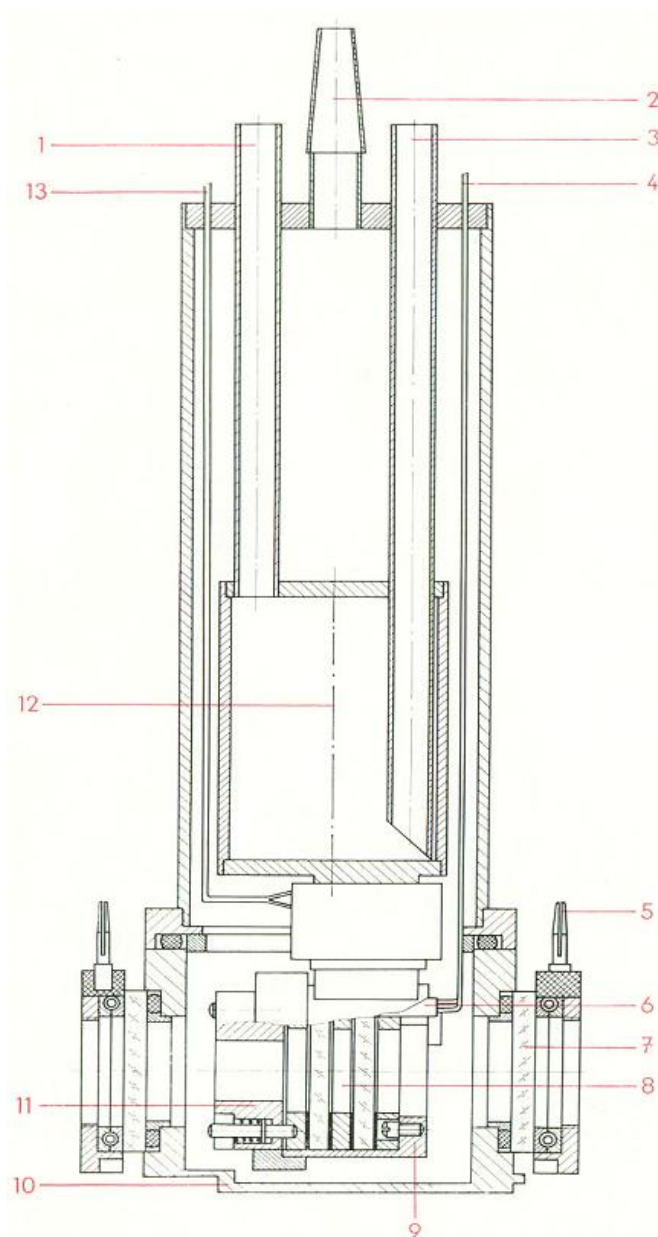

**Figure SI.3.** Home made temperature device inside the spectrometer with 1—cables for connection to power supply; 2—thermocouple; 3—pellet-sample; 4—thermo-insulating housing; 5—metallic net; 6—cable for connection of thermocouple with voltmeter. The pellet-sample with iron-constantan thermocouple which is connected to the voltmeter is fixed to the home made temperature device by metallic holder. The temperature of the pellet-sample was controlled the voltage and current which were varied by the voltage and constant current source.

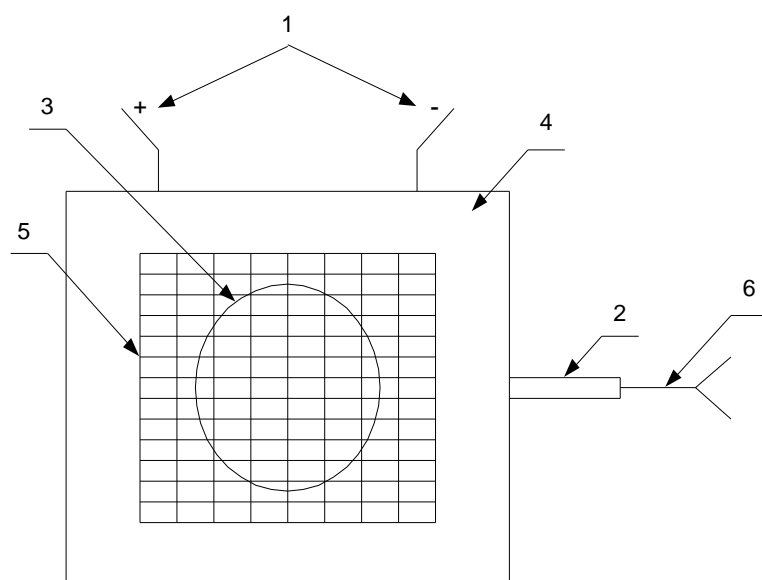

**Figure SI.4.** Calibration curves of the thermocouple (thermo EMF *versus* temperature) in the special home made thermostate and temperature add-on devices, respectively.

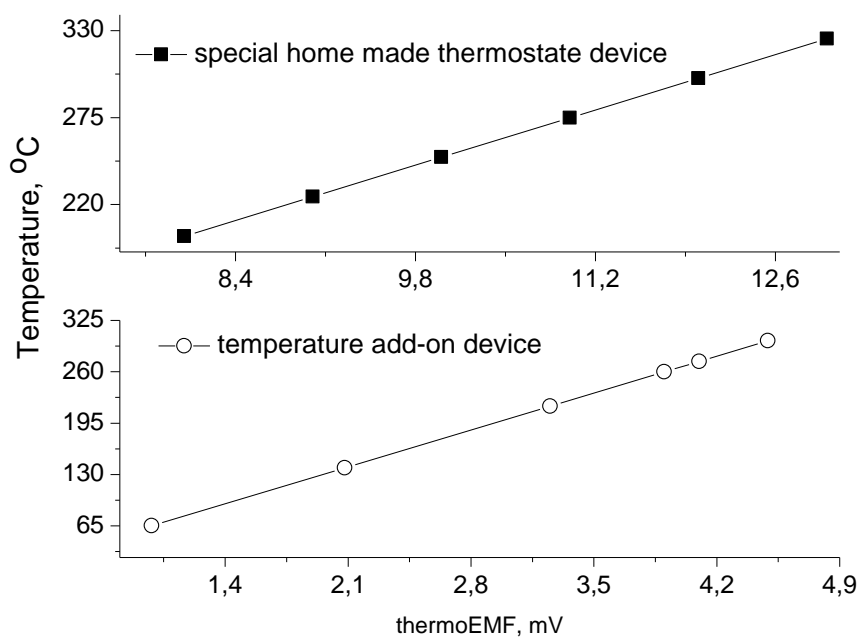

**Figure SI.5.** Raman spectrum of  $\text{LiCF}_3\text{SO}_3$  in a polymeric matrix at room temperature with bands, which are ascribed to  $\nu\text{C}-\text{S}$ ,  $\delta\text{SO}_3$ ,  $\delta\text{CF}_3$ ,  $\nu\text{SO}_3$  and  $\nu\text{C}=\text{O}$  from 200 to  $2,000\text{ cm}^{-1}$ .

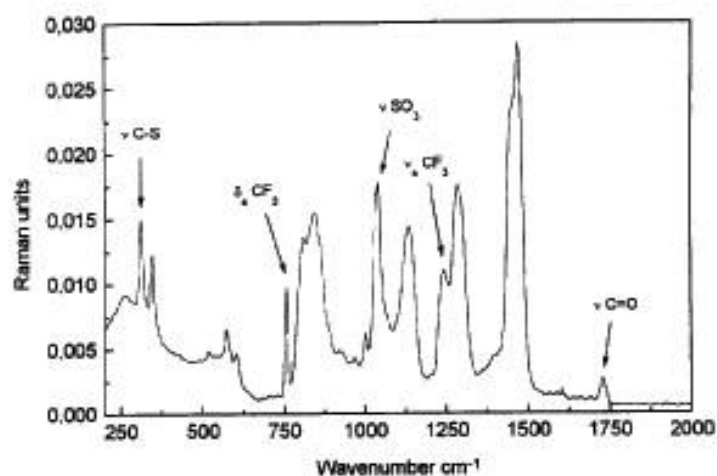

Supplement: s1 [file s1]
